# Supplementary material for: Identification of a Mutant PfCRT-Mediated Chloroquine Tolerance Phenotype in Plasmodium falciparum
Source: PLOS journal article supplement (doi:10.1371/journal.ppat.1000887), 2010-05-13
Supplement: S2 (10.1371/journal.ppat.1000887.s002) [file journal.ppat.1000887.s002]

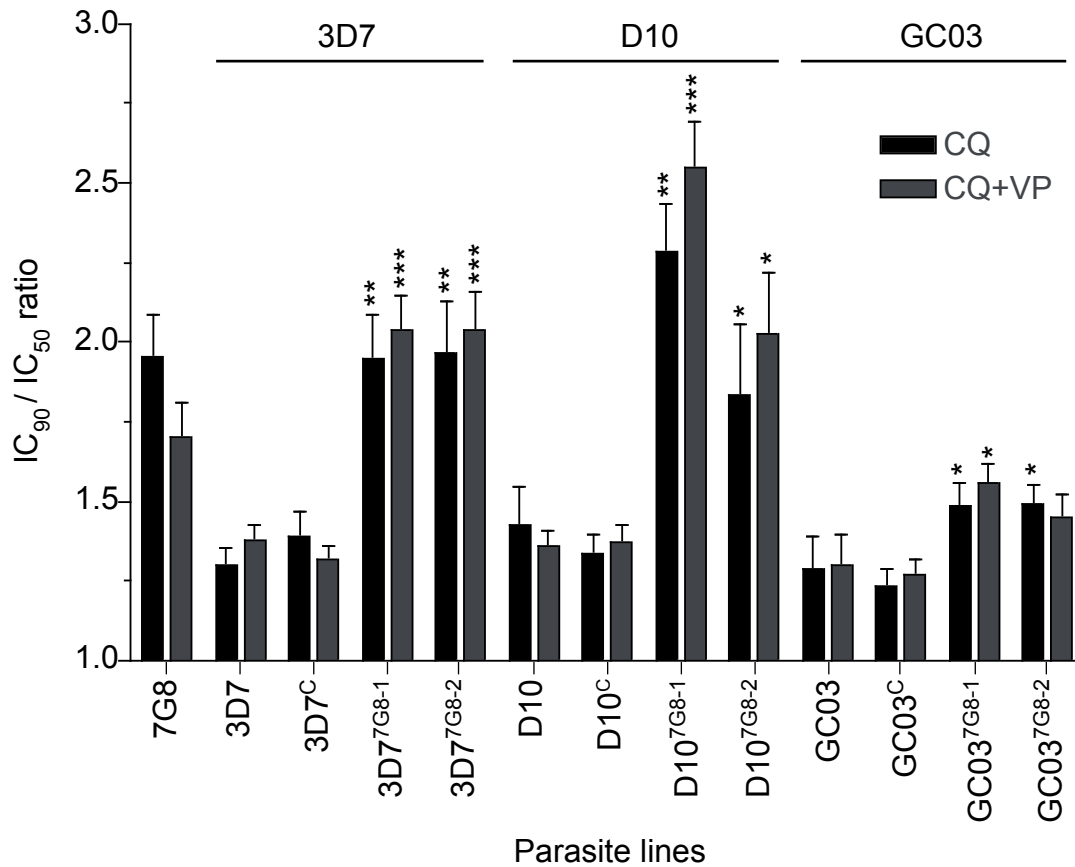

**Figure S2. Ratios of chloroquine  $IC_{90}$  to  $IC_{50}$  values in *pfcr*-modified lines.** Ratios are presented as means $\pm$ SEM, which were calculated from an average of 7 independent assays (range 4–10) performed in duplicate. Analysis of the chloroquine (CQ)  $IC_{90}/IC_{50}$  ratios for the different lines revealed a very different set of responses between the three CQ-sensitive genetic backgrounds. In 3D7, both mutant *pfcr* clones revealed mean ratios of 2.0, the same as 7G8 and noticeably greater than the ratios of 1.3–1.4 observed with 3D7<sup>C</sup> ( $P < 0.01$ ) and 3D7. For D10, where mean CQ  $IC_{50}$  values were unchanged compared to D10<sup>C</sup> (Table S1), the ratios were 1.8–2.3, a significant increase over the ratios of 1.3–1.4 again observed with D10<sup>C</sup> ( $P < 0.01$ ) and D10. Thus, in both these backgrounds the relatively modest increase in CQ  $IC_{50}$  values appeared to be compensated by a substantial increase in the ability of these parasites to withstand high CQ concentrations. For the GC03 mutants, where the baseline CQ  $IC_{50}$  values were already high, the increase in the  $IC_{90}/IC_{50}$  ratio was more modest (1.5 for both GC03<sup>G8-1</sup> and GC03<sup>G8-2</sup> vs. 1.2–1.3 for the control CQ-sensitive lines GC03<sup>C</sup> ( $P < 0.05$ ) and GC03), suggesting that the expression of mutant *pfcr* rendered GC03 parasites intrinsically more resistant to CQ than was the case for 3D7 or D10 parasites. Statistical comparisons comparing mutant *pfcr*-modified lines against recombinant control lines of the same genetic backgrounds were performed using one-way ANOVA with a Bonferroni post-hoc test.
